# Supplementary material
Source: MDPI journal article supplement (https://www.mdpi.com/2072-4292/15/15/3830)
Supplement: s1 [file s1]

## Supplementary Materials

**Table S1.** Köppen-Geiger climate classes

| 1st | 2nd    | 3rd | Description          | Criterion                                       |
|-----|--------|-----|----------------------|-------------------------------------------------|
| B   | W<br>S |     | Arid                 | $MAP < 10 \times P_{threshold}$                 |
|     |        |     | - Desert             | $MAP < 5 \times P_{threshold}$                  |
|     |        |     | - Steppe             | $MAP \geq 5 \times P_{threshold}$               |
|     |        | k   | - Cold               | $MAT < 18$                                      |
| D   | w<br>f |     | Cold                 | Not (B) & $T_{hot} > 10$<br>& $T_{cold} \leq 0$ |
|     |        |     | - Dry winter         | $P_{wdry} < P_{swet}/10$                        |
|     |        |     | - Without dry season | Not (Ds) or (Dw)                                |
|     |        | a   | - Hot summer         | $T_{hot} \geq 22$                               |
|     |        | b   | - Warm summer        | Not (a) & $T_{month} \geq 4$                    |
|     |        | c   | - Cold summer        | Not (a, b, or d)                                |
| E   | T      |     | Polar                | Not (B) & $T_{hot} \leq 10$                     |
|     |        |     | - Tundra             | $T_{hot} > 0$                                   |

MAP = mean annual precipitation (mm/y); MAT = mean annual air temperature (°C);  $T_{cold}$  = the air temperature of the coldest month (°C);  $T_{hot}$  = the air temperature of the warmest month (°C);  $T_{month}$  = the number of months with air temperature  $> 10$  °C (unitless);  $P_{wdry}$  = precipitation in the driest month in winter (mm/month);  $P_{swet}$  = precipitation in the wettest month in summer (mm/month);  $P_{threshold} = 2 \times MAT$  if  $> 70\%$  of precipitation falls in winter,  $P_{threshold} = 2 \times MAT + 28$  if  $> 70\%$  of precipitation falls in summer, otherwise  $P_{threshold} = 2 \times MAT + 14$ . Summer (winter) is the six-month period that is warmer (colder) between April-September and October-March.

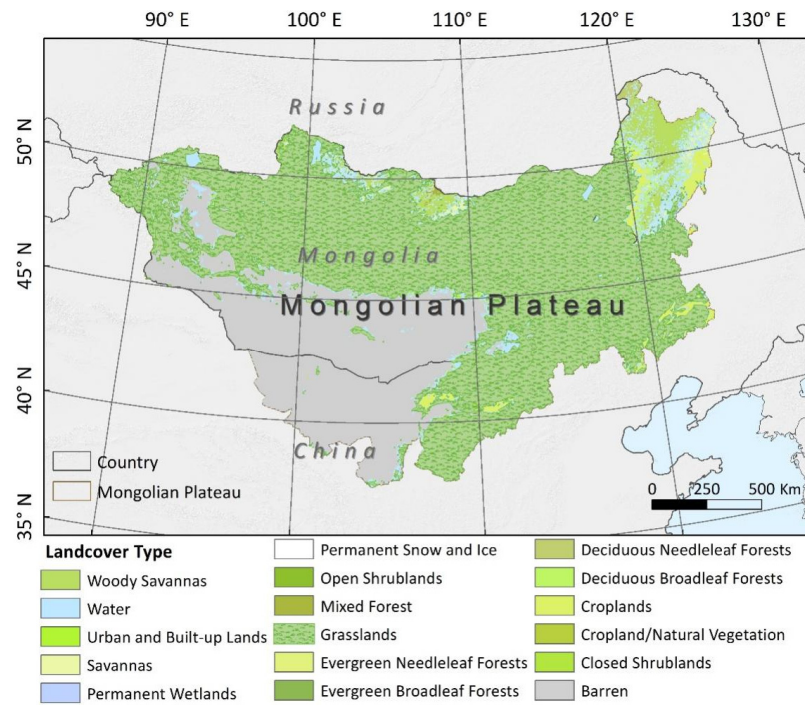

**Figure S1.** Landcover types based on MCD12C1 of the Mongolian Plateau.

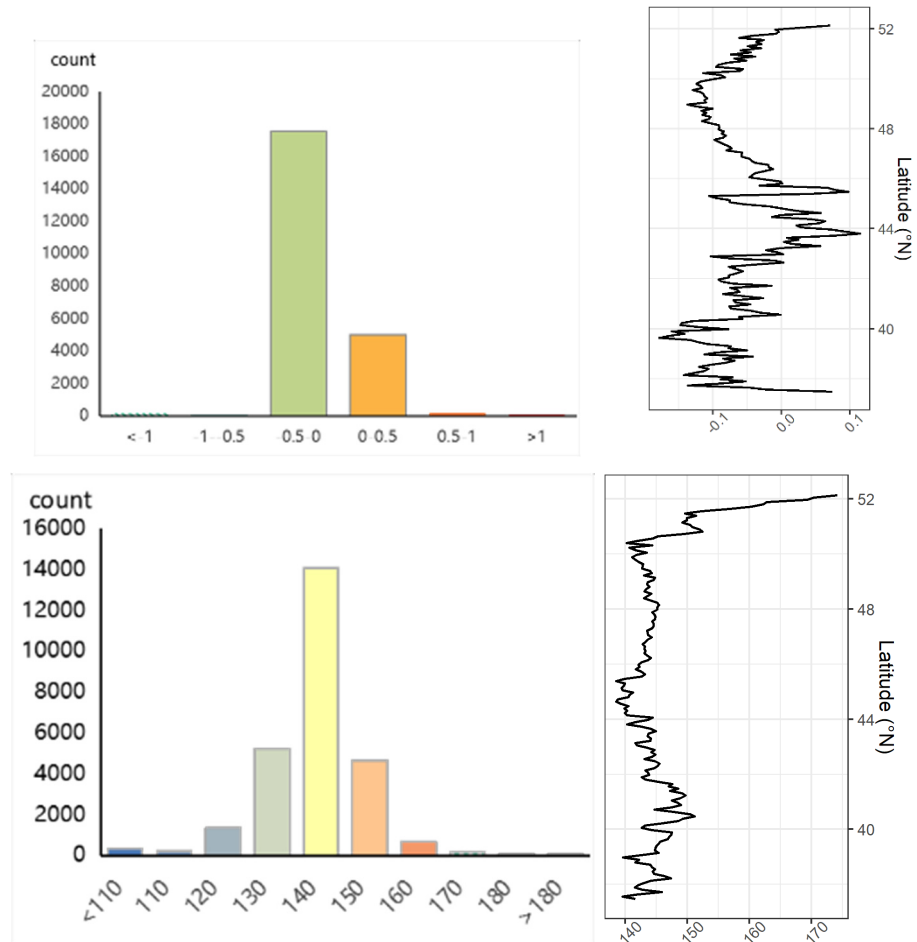

**Figure S2.** The mean value (upper) and trend (below) of GUD and its changes along the latitude of the Mongolian Plateau in 1982-2015

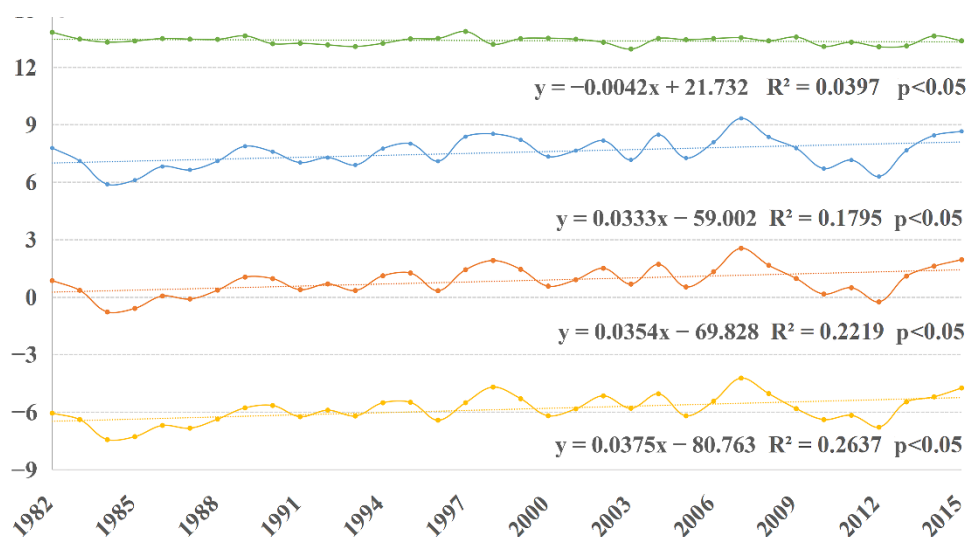

**Figure S3.** Annual TMP, TMX, TMN, and DTR (b) from 1982 to 2015 in Mongolian Plateau grassland.

**Table S2** The percentage of correlation relationship between the GUD and temperature parameters in Mongolian Plateau grassland in each month (%).

| month    | TMP     |          | TMX     |          | TMN     |          | DTR     |          |
|----------|---------|----------|---------|----------|---------|----------|---------|----------|
|          | Postive | Negative | Postive | Negative | Postive | Negative | Postive | Negative |
| January  | 77.02   | 22.98    | 26.16   | 73.84    | 19.12   | 80.88    | 72.33   | 27.67    |
| February | 74.23   | 25.77    | 73.57   | 26.43    | 87.72   | 12.28    | 65.58   | 34.42    |
| March    | 4.2     | 95.8     | 28.85   | 71.15    | 46.64   | 53.16    | 48.82   | 51.18    |
| April    | 43.28   | 56.72    | 26.23   | 73.77    | 34.69   | 65.31    | 51.38   | 48.62    |
| May      | 80.24   | 19.76    | 85.21   | 14.79    | 70.34   | 29.66    | 79.11   | 20.89    |
| June     | 97.96   | 2.04     | 98.02   | 1.98     | 96.72   | 3.28     | 70.05   | 29.95    |
